# Supplementary material
Source: PubMed Central journal article supplement (PMC4116656)
Supplement: pro0023-1077-SD1.pdf [file pro0023-1077-SD1.pdf]

## Supplementary figures

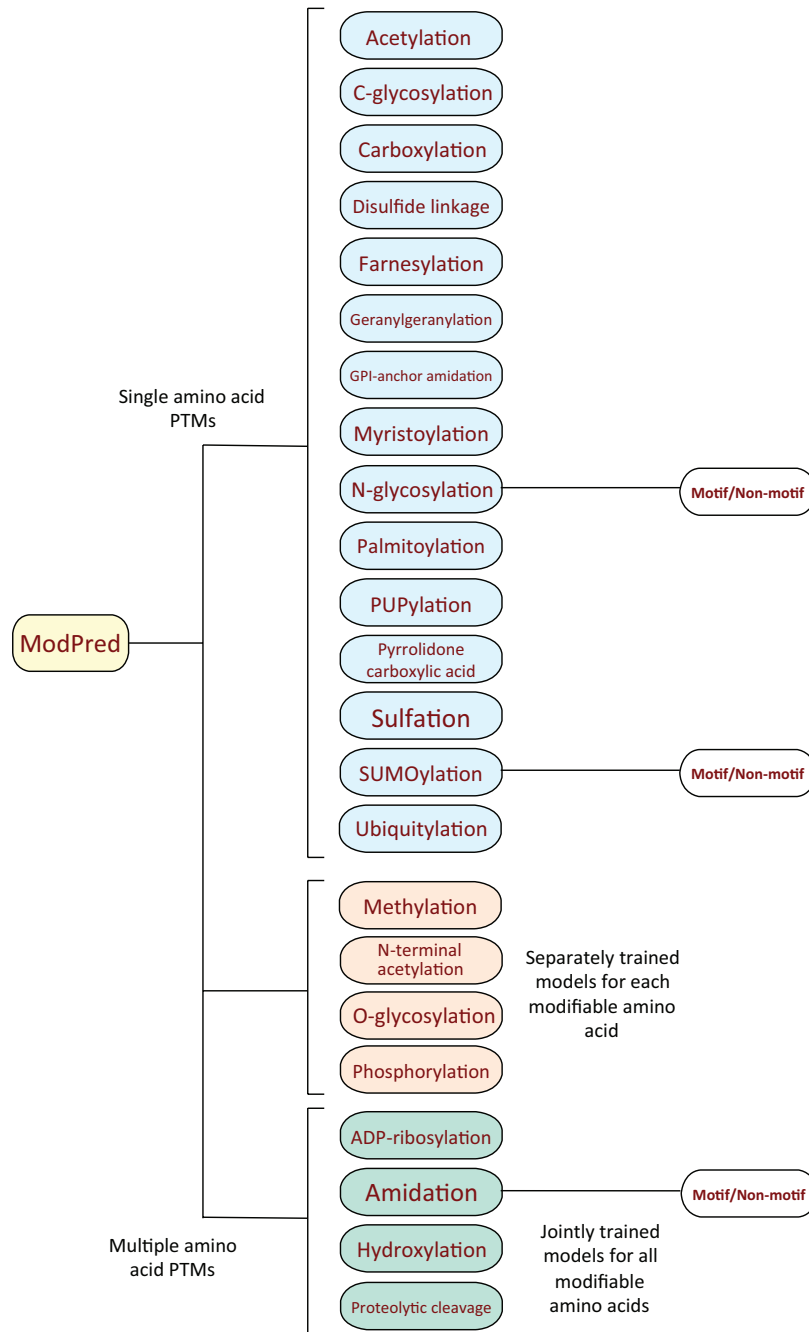

**Figure S1.** Schematic describing the training protocols for the 34 ensemble models in ModPred covering all 23 PTMs. Note that while certain PTMs are not exclusively restricted to one amino acid, we treat them as ‘single amino acid PTMs’ due to the lack of sufficient training data for the other amino acids.

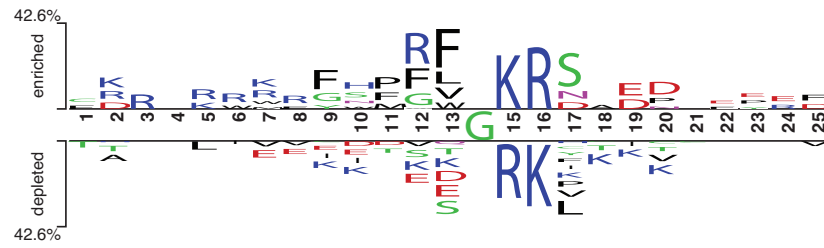

(A) Amidation (Motif: **x** - G - [KR] - [KR])

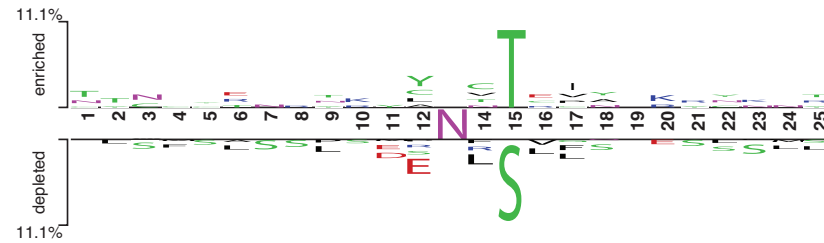

(B) N-linked glycosylation (Motif: **N** - P - [ST] - P)

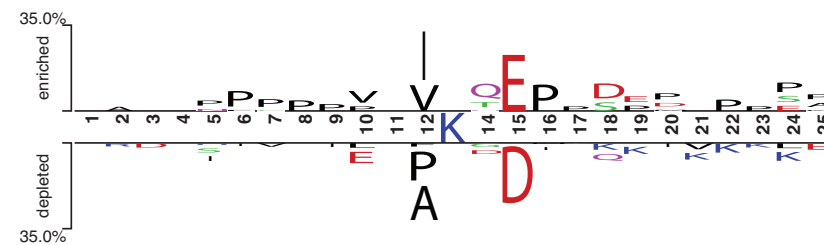

(c) SUMOylation (Motif: [AFILMPV] - **K** - x - [DE])

**Figure S2.** Two-sample logos generated for 25-amino acid fragments containing positive (modified) and negative (not known to be modified) sites for the three motif-associated modifications. In each case, the central position is occupied by the modifiable residue. Two-sample logos allow for the detection of enrichments and/or depletions of expected motifs when compared across two data sets. Here, modified sites in canonical motif regions were compared to motif-associated sites not known to be modified. In these cases, enrichments for motifs range from approximately 11% to 43%. For sizes of datasets, see Table S1.

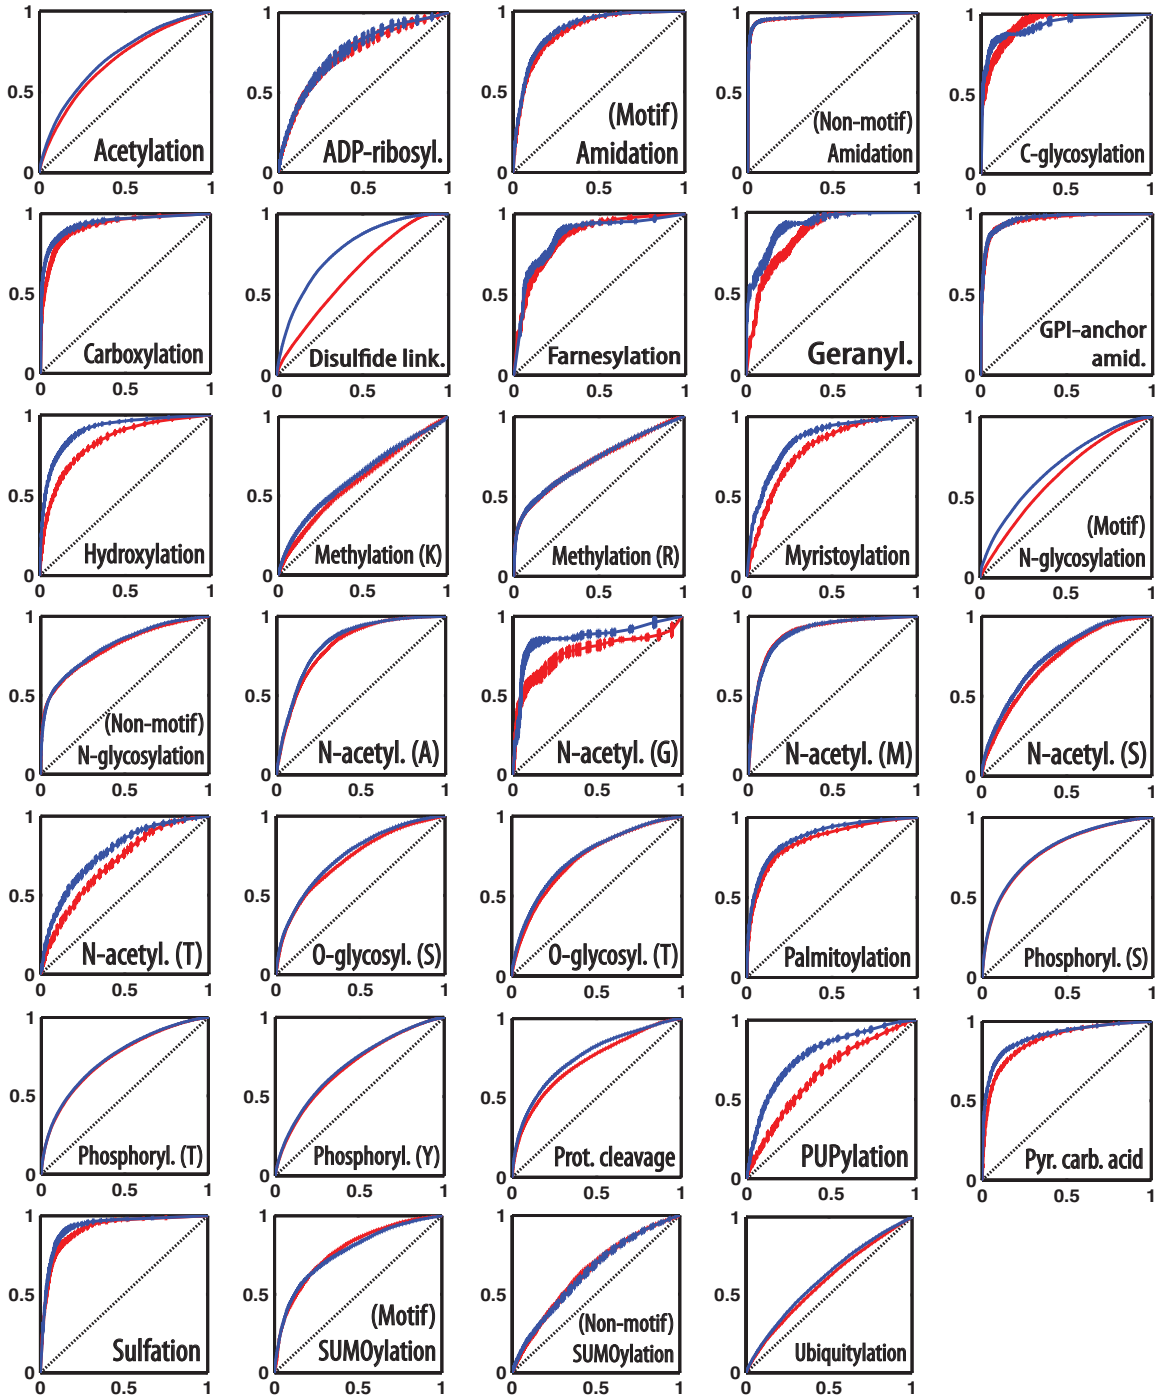

**Figure S3.** ROC curves for the performance of individual bagged logistic regression models in ModPred, with (blue curve) and without (red curve) evolutionary features (PSSMs). Mean values from 30 repetitions of cross-validation are plotted and the error bars represent the standard deviation. The x-axis represents the false positive rate ( $1 - sp$ ) and the y-axis represents the true positive rate ( $sn$ ). The diagonal dashed line in each case represents the performance of a uniformly random predictor.

## Supplementary tables

| Modification type      | Residue / Type | Number of sites |          | AUC          |              | sn at sp = 0.90 |              | sn at sp = 0.95 |              | sn at sp = 0.99 |              |
|------------------------|----------------|-----------------|----------|--------------|--------------|-----------------|--------------|-----------------|--------------|-----------------|--------------|
|                        |                | Positive        | Negative | No PSSM      | PSSM         | No PSSM         | PSSM         | No PSSM         | PSSM         | No PSSM         | PSSM         |
| Amidation              | Motif          | 210             | 476*     | 0.877        | <b>0.891</b> | 0.624           | <b>0.665</b> | 0.422           | <b>0.437</b> | <b>0.080</b>    | 0.067        |
|                        | Non-motif      | 247             | 29,490   | 0.971        | <b>0.973</b> | 0.952           | <b>0.956</b> | <b>0.935</b>    | 0.932        | 0.785           | <b>0.808</b> |
| Methylation            | K              | 303             | 10,087   | 0.594        | <b>0.622</b> | 0.194           | <b>0.250</b> | 0.113           | <b>0.155</b> | 0.027           | <b>0.042</b> |
|                        | R              | 325             | 8,474    | 0.720        | <b>0.722</b> | 0.437           | <b>0.445</b> | 0.366           | <b>0.368</b> | <b>0.211</b>    | 0.202        |
| N-linked glycosylation | Motif          | 10,567          | 7,558    | 0.627        | <b>0.686</b> | 0.169           | <b>0.277</b> | 0.092           | <b>0.175</b> | 0.020           | <b>0.066</b> |
|                        | Non-motif      | 719             | 70,492   | 0.802        | <b>0.812</b> | 0.548           | <b>0.561</b> | <b>0.473</b>    | <b>0.473</b> | <b>0.278</b>    | 0.255        |
| N-terminal acetylation | A              | 527             | 583*     | 0.821        | <b>0.838</b> | 0.447           | <b>0.464</b> | 0.265           | <b>0.285</b> | <b>0.069</b>    | 0.066        |
|                        | G              | 21              | 89*      | 0.771        | <b>0.863</b> | 0.567           | <b>0.789</b> | 0.468           | <b>0.576</b> | 0.046           | <b>0.056</b> |
|                        | M              | 334             | 616*     | <b>0.898</b> | 0.897        | <b>0.713</b>    | 0.699        | 0.487           | <b>0.501</b> | 0.129           | <b>0.145</b> |
|                        | S              | 345             | 525*     | 0.720        | <b>0.751</b> | 0.284           | <b>0.337</b> | 0.173           | <b>0.216</b> | 0.057           | <b>0.074</b> |
|                        | T              | 83              | 189*     | 0.702        | <b>0.769</b> | 0.271           | <b>0.392</b> | 0.161           | <b>0.253</b> | 0.021           | <b>0.027</b> |
| O-linked glycosylation | S              | 523             | 690      | 0.730        | <b>0.751</b> | 0.366           | <b>0.379</b> | 0.246           | <b>0.263</b> | 0.070           | <b>0.089</b> |
|                        | T              | 221             | 16,849   | 0.733        | <b>0.747</b> | 0.333           | <b>0.369</b> | 0.200           | <b>0.238</b> | 0.052           | <b>0.073</b> |
| Phosphorylation        | S              | 59,458          | 201,815  | 0.794        | <b>0.799</b> | 0.473           | <b>0.482</b> | 0.330           | <b>0.344</b> | <b>0.127</b>    | 0.116        |
|                        | T              | 19,670          | 83,104   | 0.733        | <b>0.747</b> | 0.333           | <b>0.369</b> | 0.200           | <b>0.238</b> | 0.052           | <b>0.073</b> |
|                        | Y              | 10,930          | 35,587   | 0.689        | <b>0.698</b> | 0.279           | <b>0.297</b> | 0.174           | <b>0.183</b> | <b>0.052</b>    | <b>0.052</b> |
| SUMOylation            | Motif          | 523             | 690      | <b>0.779</b> | 0.770        | 0.433           | <b>0.458</b> | 0.298           | <b>0.300</b> | 0.048           | <b>0.089</b> |
|                        | Non-motif      | 221             | 16,849   | <b>0.639</b> | 0.636        | 0.196           | <b>0.210</b> | 0.108           | <b>0.126</b> | 0.022           | <b>0.027</b> |

**Table S1.** A breakdown of performance for each amino acid in cases where the PTMs affect multiple residues or are motif-associated. The ‘No PSSM’ column represents the basic model and the ‘PSSM’ column represents the model with evolutionary features. *sn* and *sp* stand for sensitivity and specificity respectively. The closer each value in the AUC and sensitivity columns is to one, the better the performance. Values marked in bold indicate better show the better-performing model. The data sets marked with a ‘\*’ indicate that the negatives were obtained from proteins different to those containing the positives through a random sampling procedure (See Materials and Methods).

| Keyword                         | P-value  |            |          | Frequencies (Main / Control) |                 |                 |
|---------------------------------|----------|------------|----------|------------------------------|-----------------|-----------------|
|                                 | All      | Disordered | Ordered  | All                          | Disordered      | Ordered         |
| 4Fe-4S                          | -        | 2.51E-05   | 0.0016   | -                            | 0.0010 / 0.0034 | 0.0080 / 0.0027 |
| ADP-ribosylation                | 2.70E-03 | -          | -        | 0.0028 / 0.0015              | -               | -               |
| ANK repeat                      | 5.90E-03 | -          | -        | 0.0114 / 0.0087              | -               | -               |
| ATP-binding                     | 2.23E-13 | 3.05E-32   | -        | 0.0764 / 0.0992              | 0.0779 / 0.1260 | -               |
| Acetylation                     | 1.81E-60 | 2.77E-32   | 5.00E-18 | 0.1600 / 0.0990              | 0.1571 / 0.1023 | 0.1771 / 0.0970 |
| Actin-binding                   | 6.02E-29 | 3.08E-20   | -        | 0.0213 / 0.0089              | 0.0248 / 0.0107 | -               |
| Activator                       | 3.32E-86 | 2.42E-14   | -        | 0.0608 / 0.0237              | 0.0708 / 0.0480 | -               |
| Acyltransferase                 | 8.47E-17 | 5.35E-05   | 0.0039   | 0.0040 / 0.0111              | 0.0037 / 0.0074 | 0.0056 / 0.0134 |
| Adaptive immunity               | 4.00E-04 | 0.0021     | -        | 0.0016 / 0.0034              | 0.0017 / 0.0037 | -               |
| Allosteric enzyme               | 1.00E-04 | -          | -        | 0.0012 / 0.0030              | -               | -               |
| Alternative promoter usage      | 9.00E-04 | -          | -        | 0.0037 / 0.0020              | -               | -               |
| Alternative splicing            | 2.55E-73 | 1.11E-05   | 3.93E-08 | 0.4845 / 0.3336              | 0.5551 / 0.4969 | 0.1759 / 0.2499 |
| Amidation                       | 5.76E-07 | 0.0002     | 3.40E-08 | 0.0045 / 0.0019              | 0.0033 / 0.0012 | 0.0117 / 0.0024 |
| Amino-acid biosynthesis         | 5.25E-12 | -          | -        | 0.0014 / 0.0053              | -               | -               |
| Aminoacyl-tRNA synthetase       | 2.49E-07 | -          | -        | 0.0008 / 0.0030              | -               | -               |
| Angiogenesis                    | -        | 0.0038     | -        | -                            | 0.0035 / 0.0060 | -               |
| Antibiotic                      | -        | -          | 1.03E-06 | -                            | -               | 0.0141 / 0.0041 |
| Antimicrobial                   | 5.10E-03 | -          | 1.48E-08 | 0.0059 / 0.0082              | -               | 0.0311 / 0.0125 |
| Antiport                        | 2.42E-05 | 0.002      | -        | 0.0009 / 0.0027              | 0.0010 / 0.0028 | -               |
| Antiviral defense               | 9.60E-05 | 0.0019     | -        | 0.0014 / 0.0034              | 0.0014 / 0.0034 | -               |
| Autocatalytic cleavage          | 1.30E-03 | -          | -        | 0.0008 / 0.0020              | -               | -               |
| Autophagy                       | 9.50E-03 | 0.0027     | -        | 0.0029 / 0.0045              | 0.0027 / 0.0051 | -               |
| Auxin signaling pathway         | 8.90E-03 | -          | -        | 0.0008 / 0.0017              | -               | -               |
| Biom mineralization             | 2.00E-04 | -          | -        | 0.0020 / 0.0007              | -               | -               |
| Bromodomain                     | 1.83E-42 | 1.45E-21   | -        | 0.0062 / 0.0003              | 0.0073 / 0.0009 | -               |
| Cadmium                         | 2.00E-04 | 0.0047     | -        | 0.0009 / 0.0001              | 0.0010 / 0.0002 | -               |
| Calcium                         | 4.39E-15 | 5.65E-12   | 0.0001   | 0.0262 / 0.0406              | 0.0271 / 0.0428 | 0.0213 / 0.0392 |
| Calcium transport               | -        | 0.0061     | -        | -                            | 0.0040 / 0.0065 | -               |
| Carbohydrate metabolism         | 1.69E-08 | -          | -        | 0.0028 / 0.0067              | -               | -               |
| Cell adhesion                   | 1.23E-06 | 3.41E-12   | -        | 0.0116 / 0.0174              | 0.0129 / 0.0243 | -               |
| Cell cycle                      | 5.42E-14 | -          | -        | 0.0419 / 0.0283              | -               | -               |
| Cell division                   | 2.00E-04 | -          | -        | 0.0228 / 0.0176              | -               | -               |
| Cell junction                   | 5.57E-10 | -          | 0.0002   | 0.0318 / 0.0220              | -               | 0.0056 / 0.0158 |
| Cell membrane                   | 2.07E-88 | 1.18E-47   | 7.93E-35 | 0.0723 / 0.1407              | 0.0771 / 0.1376 | 0.0457 / 0.1426 |
| Cell projection                 | 4.50E-07 | -          | -        | 0.0241 / 0.0171              | -               | -               |
| Cell shape                      | 1.20E-03 | -          | -        | 0.0023 / 0.0011              | -               | -               |
| Cell wall                       | -        | 0.0029     | -        | -                            | 0.0043 / 0.0022 | -               |
| Cell wall biogenesis/degradatio | 7.07E-08 | -          | -        | 0.0029 / 0.0066              | -               | -               |

| n                                  |           |          |          |                 |                 |                 |
|------------------------------------|-----------|----------|----------|-----------------|-----------------|-----------------|
| Centromere                         | 5.00E-04  | -        | -        | 0.0074 / 0.0048 | -               | -               |
| Chaperone                          | 6.53E-05  | 0.0025   | -        | 0.0139 / 0.0097 | 0.0136 / 0.0096 | -               |
| Chemotaxis                         | 2.16E-05  | -        | -        | 0.0013 / 0.0034 | -               | -               |
| Chloroplast                        | 2.09E-12  | 3.20E-20 | -        | 0.0097 / 0.0178 | 0.0077 / 0.0207 | -               |
| Chromatin regulator                | 3.81E-46  | 2.70E-12 | -        | 0.0278 / 0.0102 | 0.0328 / 0.0194 | -               |
| Chromosomal rearrangement          | 2.31E-17  | 6.60E-06 | -        | 0.0095 / 0.0034 | 0.0106 / 0.0057 | -               |
| Chromosome                         | 4.04E-78  | 2.28E-20 | 3.49E-25 | 0.0353 / 0.0104 | 0.0355 / 0.0179 | 0.0341 / 0.0059 |
| Citrullination                     | 2.45E-35  | 1.63E-15 | 2.03E-23 | 0.0057 / 0.0004 | 0.0044 / 0.0003 | 0.0137 / 0.0005 |
| Cleavage on pair of basic residues | -         | 3.42E-08 | 0.0003   | -               | 0.0074 / 0.0144 | 0.0218 / 0.0109 |
| Coiled coil                        | 8.74E-168 | 5.36E-11 | -        | 0.1757 / 0.0774 | 0.2081 / 0.1686 | -               |
| Collagen                           | 2.11E-79  | 7.11E-41 | -        | 0.0123 / 0.0008 | 0.0145 / 0.0018 | -               |
| Cuticle                            | 2.07E-06  | 5.30E-05 | -        | 0.0019 / 0.0004 | 0.0021 / 0.0004 | -               |
| Cyclin                             | -         | 0.0002   | -        | -               | 0.0016 / 0.0041 | -               |
| Cytokine                           | 1.57E-18  | 0.0003   | -        | 0.0016 / 0.0073 | 0.0016 / 0.0040 | -               |
| Cytoplasm                          | 5.01E-22  | -        | -        | 0.3007 / 0.2407 | -               | -               |
| Cytoplasmic vesicle                | 3.70E-03  | 3.94E-06 | -        | 0.0142 / 0.0179 | 0.0153 / 0.0232 | -               |
| Cytoskeleton                       | 6.67E-44  | 0.0003   | 5.55E-08 | 0.0670 / 0.0368 | 0.0704 / 0.0585 | 0.0477 / 0.0239 |
| DNA damage                         | -         | 5.83E-05 | -        | -               | 0.0186 / 0.0260 | -               |
| DNA recombination                  | -         | 1.67E-05 | -        | -               | 0.0035 / 0.0075 | -               |
| DNA repair                         | -         | 6.64E-06 | -        | -               | 0.0153 / 0.0230 | -               |
| DNA-binding                        | 0.00E+00  | 2.38E-90 | 4.85E-92 | 0.2425 / 0.0659 | 0.2611 / 0.1400 | 0.1446 / 0.0251 |
| DNA-directed RNA polymerase        | 6.50E-03  | -        | -        | 0.0013 / 0.0025 | -               | -               |
| Defensin                           | -         | -        | 2.29E-06 | -               | -               | 0.0108 / 0.0026 |
| Developmental protein              | 1.67E-55  | 2.59E-06 | -        | 0.0829 / 0.0447 | 0.0939 / 0.0762 | -               |
| Differentiation                    | 6.31E-19  | -        | -        | 0.0386 / 0.0237 | -               | -               |
| Dioxygenase                        | 2.30E-03  | -        | -        | 0.0026 / 0.0045 | -               | -               |
| Direct protein sequencing          | -         | -        | 1.70E-07 | -               | -               | 0.1862 / 0.1301 |
| Disulfide bond                     | 1.44E-255 | 1.91E-90 | 3.18E-32 | 0.0583 / 0.1831 | 0.0523 / 0.1272 | 0.0940 / 0.2202 |
| EGF-like domain                    | 8.00E-04  | 5.46E-06 | -        | 0.0072 / 0.0104 | 0.0084 / 0.0144 | -               |
| ER-Golgi transport                 | 8.67E-16  | 6.92E-06 | -        | 0.0016 / 0.0068 | 0.0018 / 0.0050 | -               |
| Electron transport                 | 5.94E-09  | -        | 5.16E-05 | 0.0041 / 0.0088 | -               | 0.0252 / 0.0123 |
| Elongation factor                  | 9.30E-03  | -        | 1.03E-16 | 0.0021 / 0.0011 | -               | 0.0122 / 0.0008 |
| Endonuclease                       | 7.47E-06  | 2.41E-08 | -        | 0.0023 / 0.0050 | 0.0023 / 0.0069 | -               |
| Endoplasmic reticulum              | 2.16E-70  | 2.49E-22 | 1.32E-13 | 0.0212 / 0.0558 | 0.0205 / 0.0410 | 0.0252 / 0.0650 |
| Endosome                           | 8.32E-12  | 2.03E-14 | 0.0017   | 0.0102 / 0.0182 | 0.0108 / 0.0226 | 0.0065 / 0.0156 |
| Exonuclease                        | 1.70E-03  | 1.54E-05 | -        | 0.0016 / 0.0031 | 0.0018 / 0.0048 | -               |
| Extracellular matrix               | 3.70E-05  | 0.007    | -        | 0.0119 / 0.0080 | 0.0136 / 0.0100 | -               |
| FAD                                | 3.32E-21  | -        | -        | 0.0025 / 0.0097 | -               | -               |
| Fatty acid biosynthesis            | 1.85E-09  | 0.007    | -        | 0.0010 / 0.0041 | 0.0008 / 0.0021 | -               |



|                            |           |           |           |                 |                 |                 |
|----------------------------|-----------|-----------|-----------|-----------------|-----------------|-----------------|
| Fatty acid metabolism      | 1.19E-14  | 3.25E-05  | -         | 0.0027 / 0.0083 | 0.0010 / 0.0035 | -               |
| Flavoprotein               | 5.85E-18  | -         | -         | 0.0028 / 0.0095 | -               | -               |
| Fungicide                  | 3.40E-03  | -         | 5.11E-05  | 0.0031 / 0.0050 | -               | 0.0184 / 0.0078 |
| G-protein coupled receptor | 7.39E-106 | 8.73E-22  | 3.01E-24  | 0.0047 / 0.0338 | 0.0045 / 0.0159 | 0.0056 / 0.0452 |
| GTP-binding                | 7.21E-06  | 8.30E-08  | 5.67E-13  | 0.0136 / 0.0194 | 0.0068 / 0.0133 | 0.0549 / 0.0231 |
| GTPase activation          | 8.44E-11  | -         | -         | 0.0111 / 0.0056 | -               | -               |
| Glucose metabolism         | -         | -         | 0.0029    | -               | -               | 0.0056 / 0.0015 |
| Glycolysis                 | -         | -         | 5.00E-18  | -               | -               | 0.0228 / 0.0038 |
| Glycoprotein               | 0.00E+00  | 4.37E-124 | 1.91E-103 | 0.0903 / 0.2775 | 0.0949 / 0.2175 | 0.0643 / 0.3173 |
| Glycosidase                | 1.06E-32  | -         | -         | 0.0007 / 0.0083 | -               | -               |
| Glycosyltransferase        | 1.71E-82  | 8.17E-28  | -         | 0.0012 / 0.0195 | 0.0009 / 0.0099 | -               |
| Golgi apparatus            | 3.09E-62  | 2.08E-40  | 8.77E-18  | 0.0154 / 0.0436 | 0.0165 / 0.0439 | 0.0089 / 0.0434 |
| Growth regulation          | 4.02E-06  | 0.0028    | -         | 0.0046 / 0.0021 | 0.0053 / 0.0030 | -               |
| Helicase                   | 2.18E-05  | -         | -         | 0.0113 / 0.0074 | -               | -               |
| Heme                       | 7.27E-28  | 0.0009    | -         | 0.0031 / 0.0125 | 0.0008 / 0.0025 | -               |
| Homeobox                   | 1.52E-53  | 1.48E-11  | -         | 0.0241 / 0.0072 | 0.0278 / 0.0160 | -               |
| Hydrogen ion transport     | 3.11E-08  | -         | -         | 0.0014 / 0.0045 | -               | -               |
| Hydrolase                  | 1.10E-168 | 2.03E-70  | 2.71E-55  | 0.0405 / 0.1209 | 0.0435 / 0.1022 | 0.0233 / 0.1327 |
| Hydroxylation              | 2.18E-33  | 2.64E-17  | 0.0003    | 0.0104 / 0.0023 | 0.0110 / 0.0031 | 0.0070 / 0.0018 |
| Immunity                   | 8.76E-11  | 1.19E-06  | -         | 0.0091 / 0.0163 | 0.0080 / 0.0143 | -               |
| Immunoglobulin V region    | 8.28E-05  | -         | 0.0054    | 0.0020 / 0.0042 | -               | 0.0137 / 0.0068 |
| Immunoglobulin domain      | 1.75E-41  | 1.53E-30  | -         | 0.0074 / 0.0240 | 0.0059 / 0.0216 | -               |
| Inflammatory response      | 2.48E-10  | 2.46E-05  | -         | 0.0014 / 0.0050 | 0.0015 / 0.0044 | -               |
| Innate immunity            | 1.15E-07  | 8.39E-05  | -         | 0.0045 / 0.0089 | 0.0046 / 0.0085 | -               |
| Intermediate filament      | 1.46E-10  | -         | -         | 0.0057 / 0.0021 | -               | -               |
| Ion channel                | 4.11E-13  | 8.91E-16  | -         | 0.0093 / 0.0176 | 0.0103 / 0.0226 | -               |
| Ion transport              | 2.48E-53  | 2.18E-38  | 7.63E-10  | 0.0140 / 0.0386 | 0.0142 / 0.0392 | 0.0132 / 0.0382 |
| Iron                       | 4.65E-57  | 6.17E-14  | 0.0089    | 0.0086 / 0.0304 | 0.0055 / 0.0144 | 0.0272 / 0.0405 |
| Iron-sulfur                | 6.28E-06  | 2.61E-07  | -         | 0.0023 / 0.0051 | 0.0011 / 0.0044 | -               |
| Isomerase                  | 2.47E-05  | -         | -         | 0.0054 / 0.0089 | -               | -               |
| Isopeptide bond            | 2.70E-39  | 6.46E-10  | 1.40E-17  | 0.0349 / 0.0158 | 0.0338 / 0.0215 | 0.0416 / 0.0123 |
| Kelch repeat               | 3.29E-16  | 0.0007    | -         | 0.0011 / 0.0058 | 0.0013 / 0.0033 | -               |
| Keratin                    | 2.47E-44  | 6.28E-15  | 9.77E-14  | 0.0108 / 0.0017 | 0.0110 / 0.0035 | 0.0098 / 0.0006 |
| Keratinization             | 1.86E-20  | 3.71E-09  | -         | 0.0035 / 0.0003 | 0.0040 / 0.0008 | -               |
| Kinase                     | 9.12E-08  | 1.39E-15  | 0.0002    | 0.0327 / 0.0433 | 0.0351 / 0.0560 | 0.0194 / 0.0356 |
| LIM domain                 | 5.00E-04  | -         | -         | 0.0045 / 0.0025 | -               | -               |
| Lectin                     | 1.77E-13  | 0.0002    | -         | 0.0033 / 0.0090 | 0.0037 / 0.0071 | -               |
| Leucine-rich repeat        | 4.02E-37  | 6.31E-22  | -         | 0.0052 / 0.0189 | 0.0059 / 0.0184 | -               |
| Ligand-gated ion channel   | 1.44E-11  | 2.46E-10  | -         | 0.0012 / 0.0050 | 0.0014 / 0.0059 | -               |
| Ligase                     | 4.28E-07  | 1.90E-12  | -         | 0.0166 / 0.0237 | 0.0151 / 0.0275 | -               |

|                              |          |           |          |                 |                 |                 |
|------------------------------|----------|-----------|----------|-----------------|-----------------|-----------------|
| Lipid biosynthesis           | 1.29E-38 | 7.50E-10  | 6.70E-06 | 0.0020 / 0.0128 | 0.0015 / 0.0060 | 0.0047 / 0.0169 |
| Lipid degradation            | 1.02E-23 | 3.17E-06  | -        | 0.0011 / 0.0075 | 0.0011 / 0.0040 | -               |
| Lipid droplet                | 6.50E-03 | -         | -        | 0.0007 / 0.0017 | -               | -               |
| Lipid metabolism             | 3.84E-76 | 3.69E-21  | 1.53E-07 | 0.0058 / 0.0296 | 0.0040 / 0.0146 | 0.0165 / 0.0390 |
| Lipid transport              | 3.60E-03 | 0.0033    | -        | 0.0016 / 0.0030 | 0.0015 / 0.0034 | -               |
| Lipid-binding                | -        | 0.0014    | -        | -               | 0.0072 / 0.0110 | -               |
| Lipoprotein                  | 1.25E-06 | -         | -        | 0.0277 / 0.0364 | -               | -               |
| Lyase                        | 8.74E-14 | 7.00E-06  | -        | 0.0050 / 0.0118 | 0.0020 / 0.0054 | -               |
| Lysosome                     | 3.24E-32 | 2.88E-09  | -        | 0.0016 / 0.0106 | 0.0019 / 0.0066 | -               |
| MHC I                        | -        | -         | 0.0027   | -               | -               | 0.0075 / 0.0025 |
| Magnesium                    | 2.49E-23 | 8.76E-19  | -        | 0.0178 / 0.0337 | 0.0162 / 0.0327 | -               |
| Manganese                    | 4.44E-22 | 3.01E-07  | -        | 0.0055 / 0.0152 | 0.0046 / 0.0099 | -               |
| Membrane                     | 0.00E+00 | 3.65E-186 | 9.23E-55 | 0.2312 / 0.5806 | 0.2209 / 0.4821 | 0.2946 / 0.6478 |
| Metal-binding                | 8.18E-13 | -         | 0.0011   | 0.2292 / 0.1915 | -               | 0.2205 / 0.1773 |
| Metal-thiolate cluster       | 1.84E-19 | 2.64E-11  | -        | 0.0020 / 0.0000 | 0.0022 / 0.0000 | -               |
| Metalloprotease              | 1.73E-18 | 7.38E-13  | -        | 0.0021 / 0.0082 | 0.0021 / 0.0082 | -               |
| Methylation                  | 6.85E-52 | 4.26E-40  | 5.00E-18 | 0.0300 / 0.0107 | 0.0280 / 0.0082 | 0.0421 / 0.0123 |
| Methyltransferase            | 9.00E-04 | -         | -        | 0.0076 / 0.0108 | -               | -               |
| Microsome                    | 1.92E-18 | -         | -        | 0.0019 / 0.0078 | -               | -               |
| Microtubule                  | 1.12E-14 | -         | 1.89E-32 | 0.0195 / 0.0106 | -               | 0.0366 / 0.0050 |
| Mitochondrion                | 7.48E-74 | 6.77E-35  | 1.67E-05 | 0.0341 / 0.0774 | 0.0180 / 0.0438 | 0.1386 / 0.0991 |
| Mitochondrion inner membrane | 8.40E-32 | 1.07E-15  | -        | 0.0056 / 0.0182 | 0.0014 / 0.0076 | -               |
| Mitochondrion outer membrane | 1.71E-12 | 0.0009    | -        | 0.0017 / 0.0061 | 0.0018 / 0.0040 | -               |
| Mitosis                      | 4.53E-06 | -         | -        | 0.0163 / 0.0111 | -               | -               |
| Monoxygenase                 | 1.15E-24 | -         | -        | 0.0017 / 0.0090 | -               | -               |
| Motor protein                | 1.45E-05 | -         | 0.0005   | 0.0089 / 0.0054 | -               | 0.0080 / 0.0024 |
| Multifunctional enzyme       | 6.98E-22 | -         | -        | 0.0007 / 0.0061 | -               | -               |
| Muscle protein               | 9.66E-20 | 1.48E-11  | 0.001    | 0.0068 / 0.0017 | 0.0069 / 0.0019 | 0.0061 / 0.0015 |
| Myogenesis                   | 2.09E-06 | 0.0012    | -        | 0.0027 / 0.0009 | 0.0031 / 0.0012 | -               |
| Myosin                       | 7.89E-11 | 0.0001    | -        | 0.0051 / 0.0017 | 0.0052 / 0.0024 | -               |
| NAD                          | 3.42E-14 | 8.39E-06  | 4.84E-05 | 0.0065 / 0.0142 | 0.0015 / 0.0045 | 0.0366 / 0.0202 |
| NADP                         | 1.81E-41 | 1.39E-09  | -        | 0.0027 / 0.0151 | 0.0008 / 0.0045 | -               |
| Neurogenesis                 | 4.64E-13 | -         | -        | 0.0154 / 0.0081 | -               | -               |
| Neuropeptide                 | 1.46E-05 | -         | 2.09E-13 | 0.0031 / 0.0012 | -               | 0.0127 / 0.0014 |
| Nitration                    | -        | -         | 4.48E-06 | -               | -               | 0.0089 / 0.0019 |
| Nonsense-mediated mRNA decay | 4.60E-06 | -         | -        | 0.0029 / 0.0010 | -               | -               |
| Nuclease                     | 1.86E-12 | 1.27E-16  | -        | 0.0032 / 0.0086 | 0.0034 / 0.0119 | -               |
| Nucleosome core              | 2.30E-84 | 5.25E-30  | 7.76E-64 | 0.0107 / 0.0003 | 0.0076 / 0.0004 | 0.0292 / 0.0002 |
| Nucleotide-binding           | 8.98E-22 | 1.94E-43  | -        | 0.0932 / 0.1270 | 0.0870 / 0.1481 | -               |
| Nucleotidyltransferase       | 4.36E-08 | 4.00E-11  | -        | 0.0025 / 0.0060 | 0.0025 / 0.0083 | -               |

|                               |           |           |          |                 |                 |                 |
|-------------------------------|-----------|-----------|----------|-----------------|-----------------|-----------------|
| Nucleus                       | 0.00E+00  | 1.51E-119 | 1.08E-14 | 0.6525 / 0.2349 | 0.7593 / 0.4375 | 0.2233 / 0.1367 |
| Olfaction                     | 1.30E-45  | -         | -        | 0.0009 / 0.0114 | -               | -               |
| Oxidoreductase                | 2.30E-88  | 3.52E-17  | -        | 0.0157 / 0.0519 | 0.0058 / 0.0163 | -               |
| Peroxisome                    | 2.02E-14  | 0.0051    | -        | 0.0023 / 0.0076 | 0.0014 / 0.0031 | -               |
| Phosphoprotein                | 0.00E+00  | 1.23E-111 | 0.0066   | 0.7811 / 0.2866 | 0.9462 / 0.5626 | 0.1948 / 0.1609 |
| Plant defense                 | 1.02E-06  | -         | -        | 0.0057 / 0.0101 | -               | -               |
| Plastid                       | 1.60E-12  | 3.20E-20  | -        | 0.0097 / 0.0179 | 0.0077 / 0.0207 | -               |
| Polymorphism                  | 6.33E-35  | 2.35E-07  | -        | 0.2712 / 0.2021 | 0.2900 / 0.2495 | -               |
| Potassium                     | 1.30E-05  | 2.21E-08  | -        | 0.0044 / 0.0078 | 0.0040 / 0.0096 | -               |
| Potassium channel             | -         | 0.0042    | -        | -               | 0.0029 / 0.0052 | -               |
| Potassium transport           | 3.07E-05  | 3.91E-08  | -        | 0.0036 / 0.0066 | 0.0040 / 0.0094 | -               |
| Prenylation                   | 3.90E-08  | -         | -        | 0.0043 / 0.0087 | -               | -               |
| Protease                      | 2.13E-67  | 7.80E-31  | 1.18E-18 | 0.0081 / 0.0321 | 0.0087 / 0.0267 | 0.0047 / 0.0354 |
| Protease inhibitor            | 5.06E-12  | -         | -        | 0.0015 / 0.0056 | -               | -               |
| Proteasome                    | 3.95E-11  | 3.09E-06  | -        | 0.0012 / 0.0049 | 0.0010 / 0.0037 | -               |
| Protein biosynthesis          | -         | 0.0053    | 0.0006   | -               | 0.0058 / 0.0088 | 0.0184 / 0.0089 |
| Protein kinase inhibitor      | 2.00E-04  | -         | -        | 0.0016 / 0.0005 | -               | -               |
| Protein phosphatase           | 3.25E-08  | 1.54E-05  | -        | 0.0043 / 0.0088 | 0.0048 / 0.0093 | -               |
| Protein phosphatase inhibitor | 6.75E-25  | 2.34E-13  | -        | 0.0040 / 0.0003 | 0.0047 / 0.0006 | -               |
| Protein synthesis inhibitor   | 9.70E-03  | -         | -        | 0.0007 / 0.0002 | -               | -               |
| Protein transport             | 3.61E-33  | 7.57E-25  | 1.35E-08 | 0.0181 / 0.0379 | 0.0188 / 0.0400 | 0.0137 / 0.0367 |
| Proteoglycan                  | 1.00E-10  | 0.0002    | -        | 0.0055 / 0.0020 | 0.0057 / 0.0027 | -               |
| Proto-oncogene                | 3.25E-08  | -         | -        | 0.0088 / 0.0046 | -               | -               |
| Pyridoxal phosphate           | 1.64E-19  | -         | -        | 0.0008 / 0.0059 | -               | -               |
| Pyrrolidone carboxylic acid   | -         | 0.0005    | -        | -               | 0.0034 / 0.0013 | -               |
| Pyruvate                      | -         | -         | 2.16E-05 | -               | -               | 0.0070 / 0.0013 |
| RNA-binding                   | 1.02E-76  | 6.70E-30  | -        | 0.0645 / 0.0276 | 0.0726 / 0.0403 | -               |
| Receptor                      | 5.39E-164 | 8.62E-74  | 4.13E-42 | 0.0166 / 0.0739 | 0.0176 / 0.0597 | 0.0108 / 0.0829 |
| Redox-active center           | 6.35E-10  | 0.0018    | -        | 0.0014 / 0.0049 | 0.0009 / 0.0025 | -               |
| Repeat                        | 1.88E-60  | 0.002     | -        | 0.3435 / 0.2379 | 0.3771 / 0.3463 | -               |
| Repressor                     | 1.93E-119 | 3.56E-33  | -        | 0.0537 / 0.0155 | 0.0618 / 0.0313 | -               |
| Respiratory chain             | -         | -         | 4.05E-05 | -               | -               | 0.0156 / 0.0059 |
| Ribonucleoprotein             | 7.22E-18  | 4.05E-12  | 5.30E-26 | 0.0329 / 0.0197 | 0.0265 / 0.0147 | 0.0717 / 0.0227 |
| Ribosomal protein             | 2.36E-05  | 0.0021    | 9.01E-29 | 0.0207 / 0.0152 | 0.0130 / 0.0090 | 0.0674 / 0.0190 |
| Ribosome biogenesis           | 6.68E-18  | 3.27E-07  | -        | 0.0105 / 0.0039 | 0.0115 / 0.0058 | -               |
| S-adenosyl-L-methionine       | 5.00E-04  | -         | -        | 0.0064 / 0.0095 | -               | -               |
| S-nitrosylation               | -         | -         | 0.0079   | -               | -               | 0.0051 / 0.0015 |
| SH3 domain                    | 8.11E-12  | -         | -        | 0.0132 / 0.0068 | -               | -               |
| SH3-binding                   | 2.01E-12  | 0.0012    | -        | 0.0052 / 0.0016 | 0.0061 / 0.0033 | -               |
| Secreted                      | 1.58E-42  | -         | 0.0048   | 0.0593 / 0.0990 | -               | 0.0968 / 0.1236 |

|                                 |           |           |          |                 |                 |                 |
|---------------------------------|-----------|-----------|----------|-----------------|-----------------|-----------------|
| Sensory transduction            | 1.09E-37  | -         | 3.30E-10 | 0.0049 / 0.0184 | -               | 0.0056 / 0.0254 |
| Serine protease                 | 4.57E-29  | 1.30E-08  | -        | 0.0009 / 0.0081 | 0.0010 / 0.0047 | -               |
| Serine protease inhibitor       | 1.94E-08  | -         | -        | 0.0010 / 0.0038 | -               | -               |
| Serine/threonine-protein kinase | -         | 3.59E-06  | -        | -               | 0.0300 / 0.0409 | -               |
| Signal                          | 4.33E-148 | 4.47E-39  | 2.66E-16 | 0.1022 / 0.2150 | 0.0941 / 0.1538 | 0.1513 / 0.2558 |
| Signal-anchor                   | 8.83E-47  | 1.36E-13  | -        | 0.0069 / 0.0245 | 0.0074 / 0.0171 | -               |
| Sodium                          | 8.49E-07  | 3.93E-05  | -        | 0.0028 / 0.0061 | 0.0030 / 0.0065 | -               |
| Sodium transport                | 7.23E-07  | 2.87E-05  | -        | 0.0027 / 0.0060 | 0.0029 / 0.0064 | -               |
| Spermatogenesis                 | 6.80E-03  | -         | -        | 0.0081 / 0.0059 | -               | -               |
| Spliceosome                     | 1.21E-23  | 5.36E-15  | -        | 0.0123 / 0.0042 | 0.0141 / 0.0053 | -               |
| Steroid metabolism              | 6.13E-14  | -         | -        | 0.0008 / 0.0046 | -               | -               |
| Stress response                 | 2.16E-05  | -         | 6.09E-05 | 0.0114 / 0.0075 | -               | 0.0170 / 0.0070 |
| Sulfation                       | -         | -         | 0.0065   | -               | -               | 0.0056 / 0.0018 |
| Sushi                           | 0.0013    | -         | -        | 0.0008 / 0.0021 | -               | -               |
| Symport                         | 1.18E-28  | -         | -        | 0.0007 / 0.0075 | -               | -               |
| Synapse                         | 0.0022    | -         | -        | 0.0161 / 0.0126 | -               | -               |
| TPR repeat                      | 6.71E-10  | 1.52E-11  | -        | 0.0034 / 0.0080 | 0.0040 / 0.0109 | -               |
| Thiamine pyrophosphate          | -         | -         | 0.0054   | -               | -               | 0.0051 / 0.0015 |
| Thick filament                  | 8.17E-09  | 0.0009    | -        | 0.0020 / 0.0003 | 0.0023 / 0.0008 | -               |
| Thiol protease                  | 0.0004    | 0.0037    | -        | 0.0043 / 0.0070 | 0.0051 / 0.0081 | -               |
| Thylakoid                       | 2.47E-05  | 1.85E-05  | -        | 0.0012 / 0.0033 | 0.0009 / 0.0033 | -               |
| Tight junction                  | 1.65E-05  | 0.0062    | -        | 0.0046 / 0.0022 | 0.0049 / 0.0028 | -               |
| Topoisomerase                   | 0.0001    | -         | -        | 0.0012 / 0.0003 | -               | -               |
| Transcription                   | 0.00E+00  | 3.69E-89  | 6.14E-37 | 0.2691 / 0.0830 | 0.3005 / 0.1668 | 0.1138 / 0.0372 |
| Transcription regulation        | 0.00E+00  | 3.48E-91  | 1.83E-40 | 0.2644 / 0.0789 | 0.2953 / 0.1621 | 0.1109 / 0.0335 |
| Transducer                      | 1.15E-106 | 6.85E-24  | 5.30E-26 | 0.0061 / 0.0375 | 0.0061 / 0.0196 | 0.0061 / 0.0487 |
| Transferase                     | 2.04E-105 | 8.38E-51  | 4.16E-28 | 0.0531 / 0.1192 | 0.0547 / 0.1079 | 0.0441 / 0.1263 |
| Transit peptide                 | 4.26E-55  | 4.60E-51  | 2.34E-06 | 0.0248 / 0.0562 | 0.0130 / 0.0424 | 0.0990 / 0.0649 |
| Translation regulation          | 0.0034    | -         | -        | 0.0068 / 0.0047 | -               | -               |
| Transmembrane                   | 0.00E+00  | 1.28E-230 | 4.37E-58 | 0.1169 / 0.3961 | 0.1058 / 0.3029 | 0.1862 / 0.4602 |
| Transmembrane helix             | 0.00E+00  | 2.09E-228 | 4.78E-57 | 0.1168 / 0.3933 | 0.1057 / 0.3012 | 0.1862 / 0.4565 |
| Transport                       | 1.07E-171 | 1.20E-96  | 7.68E-21 | 0.0516 / 0.1417 | 0.0484 / 0.1240 | 0.0706 / 0.1528 |
| Tricarboxylic acid cycle        | 0.0001    | -         | 6.07E-22 | 0.0037 / 0.0018 | -               | 0.0218 / 0.0025 |
| Triplet repeat expansion        | 1.68E-07  | 0.0012    | -        | 0.0014 / 0.0002 | 0.0016 / 0.0004 | -               |
| Tumor antigen                   | 3.87E-08  | 8.40E-05  | -        | 0.0021 / 0.0004 | 0.0024 / 0.0006 | -               |
| Tumor suppressor                | 0.0003    | -         | -        | 0.0072 / 0.0045 | -               | -               |
| Tyrosine-protein kinase         | 0.0017    | 1.89E-08  | -        | 0.0034 / 0.0055 | 0.0038 / 0.0093 | -               |
| Ubiquinone                      | -         | -         | 0.0013   | -               | -               | 0.0065 / 0.0018 |
| Ubl conjugation                 | 2.12E-56  | 1.77E-06  | 1.43E-14 | 0.0752 / 0.0391 | 0.0775 / 0.0615 | 0.0616 / 0.0258 |
| Ubl conjugation pathway         | 8.74E-14  | 9.37E-21  | 3.05E-09 | 0.0239 / 0.0369 | 0.0265 / 0.0485 | 0.0089 / 0.0299 |

|                       |           |          |          |                 |                 |                 |
|-----------------------|-----------|----------|----------|-----------------|-----------------|-----------------|
| Vacuole               | 2.04E-13  | 4.65E-06 | -        | 0.0018 / 0.0064 | 0.0016 / 0.0048 | -               |
| WD repeat             | 6.90E-18  | 6.59E-22 | -        | 0.0063 / 0.0150 | 0.0074 / 0.0208 | -               |
| Wnt signaling pathway | 1.86E-12  | 0.0003   | -        | 0.0115 / 0.0055 | 0.0132 / 0.0085 | -               |
| Zinc                  | 5.36E-112 | 4.08E-15 | 3.40E-15 | 0.1741 / 0.0906 | 0.1844 / 0.1416 | 0.1179 / 0.0614 |
| Zinc-finger           | 1.72E-212 | 9.85E-34 | 4.34E-43 | 0.1523 / 0.0556 | 0.1615 / 0.1045 | 0.1018 / 0.0277 |
| Zymogen               | 6.61E-34  | 6.29E-12 | -        | 0.0018 / 0.0113 | 0.0016 / 0.0069 | -               |
| mRNA processing       | 1.22E-54  | 5.89E-31 | -        | 0.0320 / 0.0115 | 0.0369 / 0.0154 | -               |
| mRNA splicing         | 5.71E-62  | 1.80E-38 | -        | 0.0267 / 0.0077 | 0.0309 / 0.0100 | -               |
| rRNA processing       | 2.09E-06  | -        | -        | 0.0091 / 0.0053 | -               | -               |
| rRNA-binding          | 0.004     | -        | 4.03E-08 | 0.0034 / 0.0020 | -               | 0.0117 / 0.0024 |
| tRNA processing       | 2.24E-18  | 5.65E-12 | -        | 0.0009 / 0.0058 | 0.0009 / 0.0054 | -               |

**Table S2.** Complete list of significant keywords in the set of proteins enriched in multiple types of PTM sites (arranged in alphabetical order). All three main vs. control set analyses are shown in the table with P-values and frequencies. P-values are color-coded as follows: red – significantly depleted and blue – significantly enriched. Hyphens imply no significance.
